# Supplementary material for: SEDIST: Spatially Enhanced Domain Identification through Spatial Transcriptomics
Source: Research Square preprint supplement (doi:10.21203/rs.3.rs-6619020/v1), 2025-05-19
Supplement: Supplementary file 1 [file 93023eaa53f6d27d266da7da.docx]

**Supplementary Document**

**SEDIST: Spatially Enhanced Domain Identification through Spatial Transcriptomics**

Abdullah Al Sakib1, Fahad Rahman1, Riasat Azim1,*, Fahim Hafiz1,Shabrina Airen Esha1, Umme Aimon Bristy1.

1Department of Computer Science and Engineering, United International University, Dhaka 1212, Bangladesh.

*Riasat Azim. Tel: +8801796619200; Email: riasat@cse.uiu.ac.bd

# Supplementary Equations

SSCL is modeled by utilizing binary cross-entropy (BCE). The **contrastive loss** has the following formal definition as shown in **equation S1**:

Where dual neural network discriminator that separates the positive pairs from the negative pairs. indicates the probability score that the positive pair has been given. Since the original graph and the modified graph have the same topological structure, **symmetric contrastive loss** is adopted for the modified corrupt graph in order to improve the stability and balance of the model as mentioned in **equation S2**:

# Supplementary Tables

**Table S1.** ARI Comparison of SEDIST, GraphST, DeepST, ConST, GRAS4T, GAAEST, MNMST, SpaGCN and SpaceFlow for all ST Datasets slices used in this study.

| **Method** | **SEDIST** | **GraphST** | **DeepST** | **ConST** | **GRAS4T** | **GAAEST** | **MNMST** | **SpaGCN** | **SpaceFlow** |
| --- | --- | --- | --- | --- | --- | --- | --- | --- | --- |
| **Dataset Slices** | ARI | ARI | ARI | ARI | ARI | ARI | ARI | ARI | ARI |
| 151507 | 0.4361 | 0.4254 | 0.5529 | 0.26 | 0.5096 | 0.4321 | 0.5203 | 0.43 | 0.31 |
| 151508 | 0.4894 | 0.4511 | 0.4675 | 0.37 | 0.4701 | 0.3591 | 0.4734 | 0.38 | 0.26 |
| 151509 | 0.4837 | 0.4482 | 0.5128 | 0.42 | 0.3516 | 0.4321 | 0.4756 | 0.37 | 0.21 |
| 151510 | 0.6244 | 0.5004 | 0.3048 | 0.33 | 0.4179 | 0.4525 | 0.3627 | 0.4 | 0.21 |
| 151669 | 0.4426 | 0.4356 | 0.2959 | 0.3 | 0.2727 | 0.3812 | 0.4601 | 0.3 | 0.2 |
| 151670 | 0.6244 | 0.5004 | 0.3048 | 0.23 | 0.2818 | 0.4338 | 0.3829 | 0.21 | 0.17 |
| 151671 | 0.5926 | 0.5768 | 0.373 | 0.38 | 0.4857 | 0.6226 | 0.4923 | 0.38 | 0.26 |
| 151672 | 0.6273 | 0.5733 | 0.4512 | 0.38 | 0.4331 | 0.6415 | 0.5738 | 0.51 | 0.28 |
| *151673 | 0.6466 | 0.6123 | 0.5855 | 0.51 | 0.2735 | 0.5097 | 0.6012 | 0.4557 | 0.35 |
| 151674 | 0.5993 | 0.5561 | 0.4575 | 0.45 | 0.3655 | 0.4722 | 0.5361 | 0.41 | 0.34 |
| 151675 | 0.5366 | 0.4816 | 0.5112 | 0.44 | 0.3367 | 0.3917 | 0.5572 | 0.39 | 0.25 |
| 151676 | 0.5366 | 0.5458 | 0.5623 | 0.39 | 0.3577 | 0.3373 | 0.4798 | 0.32 | 0.29 |

**Table S2.** Description of ST datasets used in this study.

| Platform | Tissue | Slice | Spots | Related Figures | Reference |
| --- | --- | --- | --- | --- | --- |
| 10x Visium | Human  dorsolateral prefrontal  cortex (DLPFC) | 151507 | 4,226 | Fig. 2C | [1] |
| 151508 | 4,384 | Fig. 2D |
| 151509 | 4,789 | Fig. 2E |
| 151510 | 3,498 | Fig. 2F |
| 151669 | 3,661 | Fig. 2G |
| 151670 | 3,498 | Fig. 2H |
| 151671 | 4,110 | Fig. 2I |
| 151672 | 4,015 | Fig. 2J |
| 151673 | 3,639 | Fig. 2B,Fig. 2K, Fig.4 |
| 151674 | 3,673 | Fig. 2L |
| 151675 | 3,592 | Fig. 2M |
| 151676 | 3,460 | Fig. 2N |
| 10x Visium | Human Breast Cancer (BRCA) | Block A Section 1 | 3,798 | Fig. 5 | [2] |

# Supplementary Figures

**Figure S1.** Visualization of Gene Expression and Spatial Architecture on the 151673 slices of the DLPFC dataset.

-
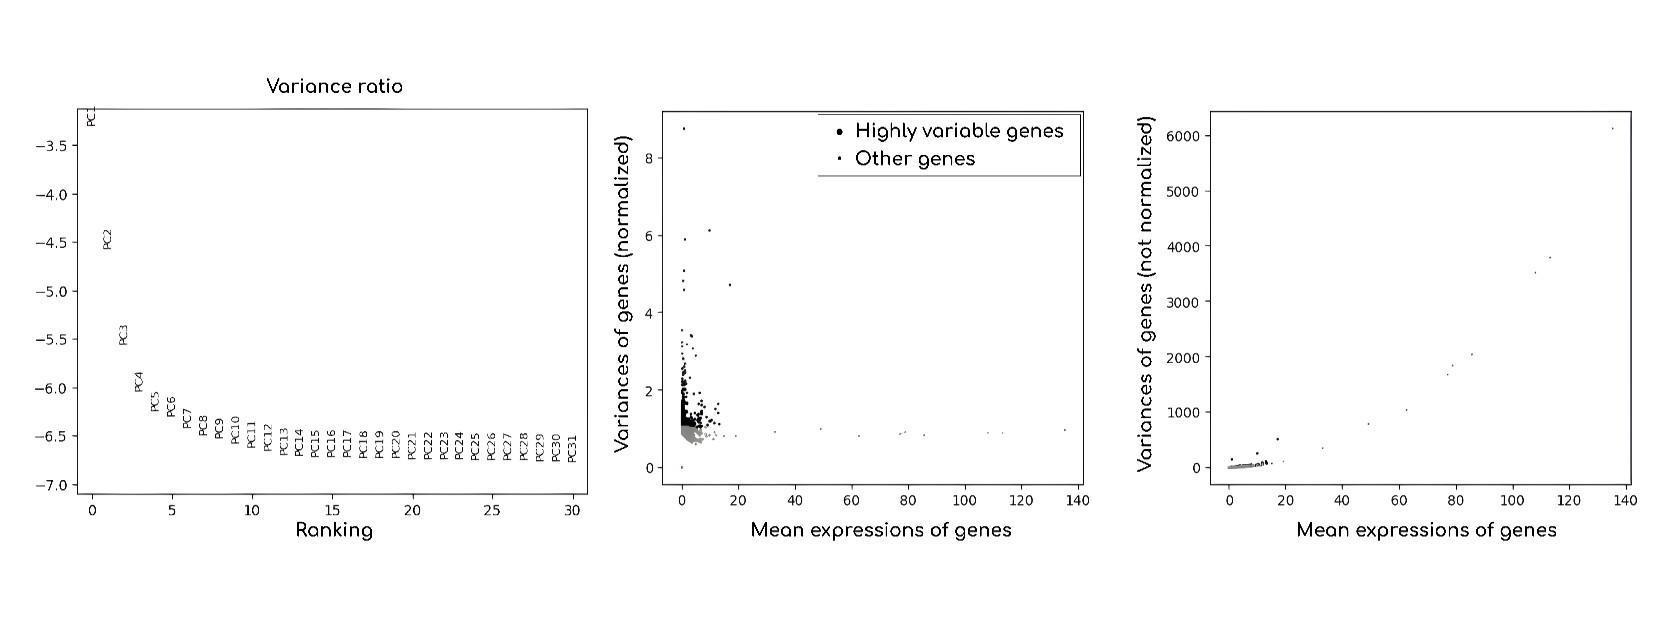


**Figure S1.** Visualization of Gene Expression and Spatial Architecture using SEDIST. Visualization of Feature Amounts in PCA and Comparison of Normalized and Non-Normalized Gene Expression.

**Figure S2.** Visualization of top 5 Spatially Variable Genes on each cluster in the 151673 slices of DLPFC dataset.


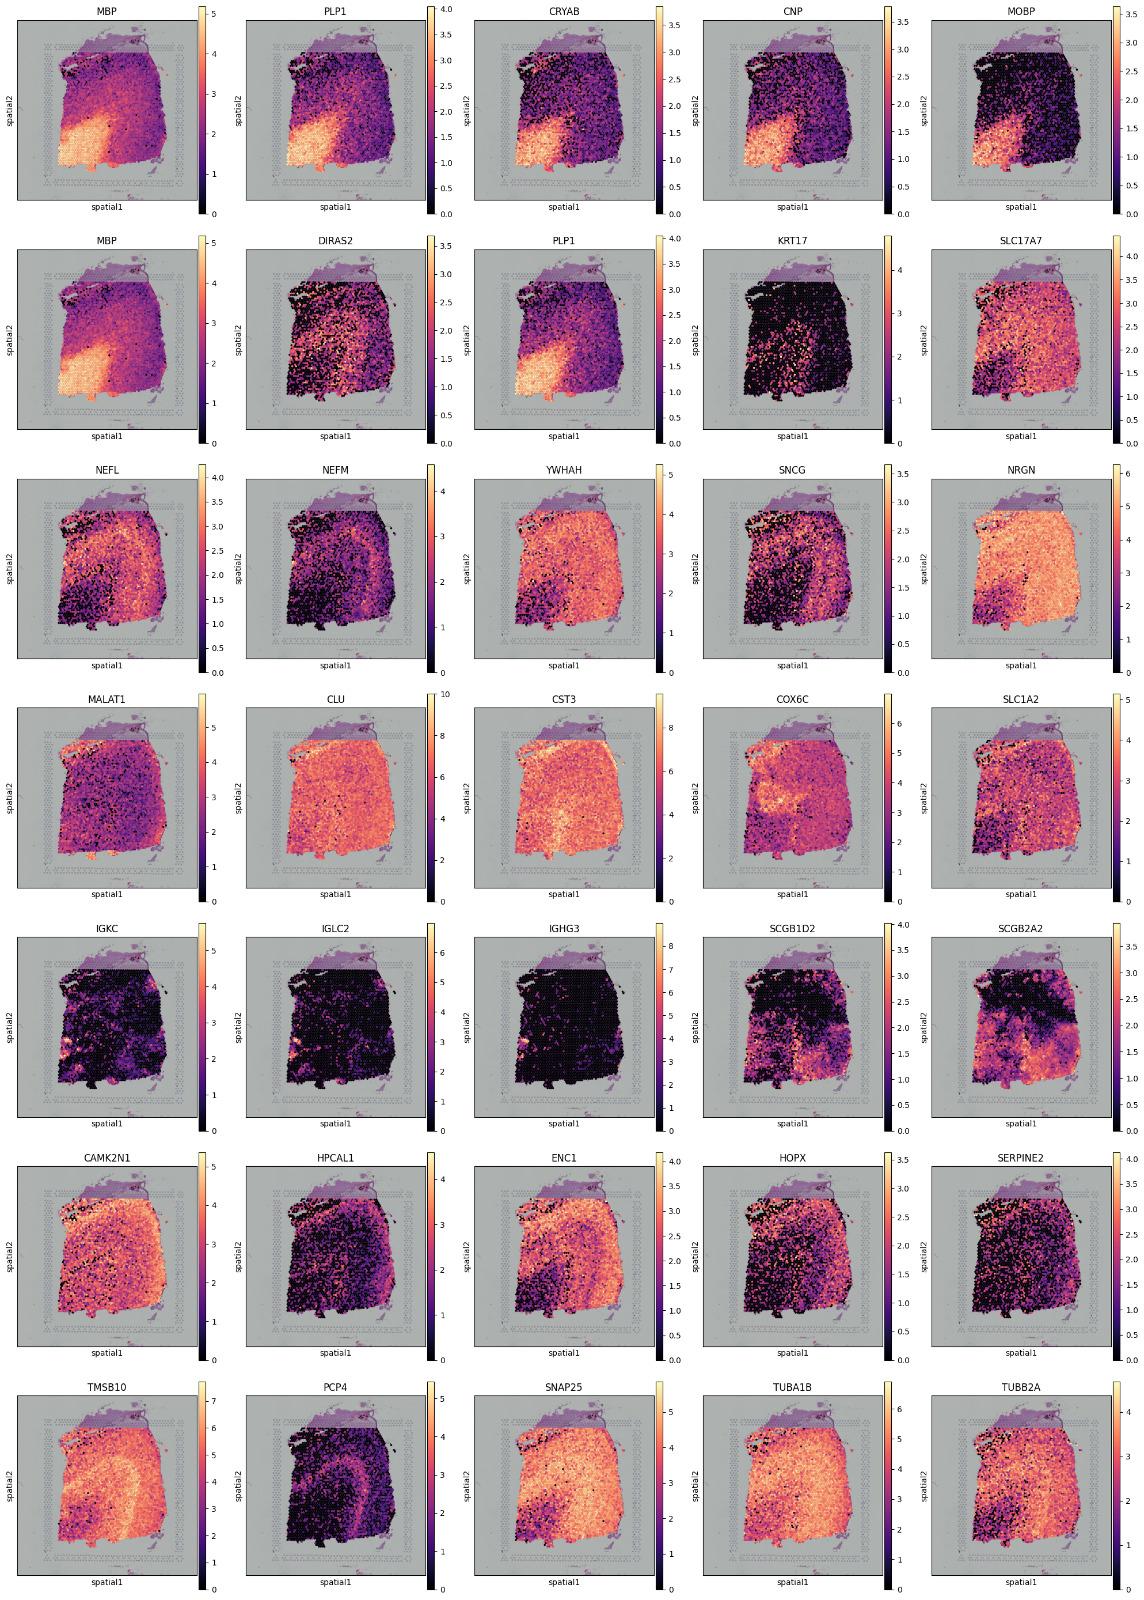


**Figure S2.** Visualization of Spatially Variable Gene Expression

**Figure S3.** Visualization of top 20 Expressed Genes by percentage of total counts in the slice 151673 of DLPFC dataset.


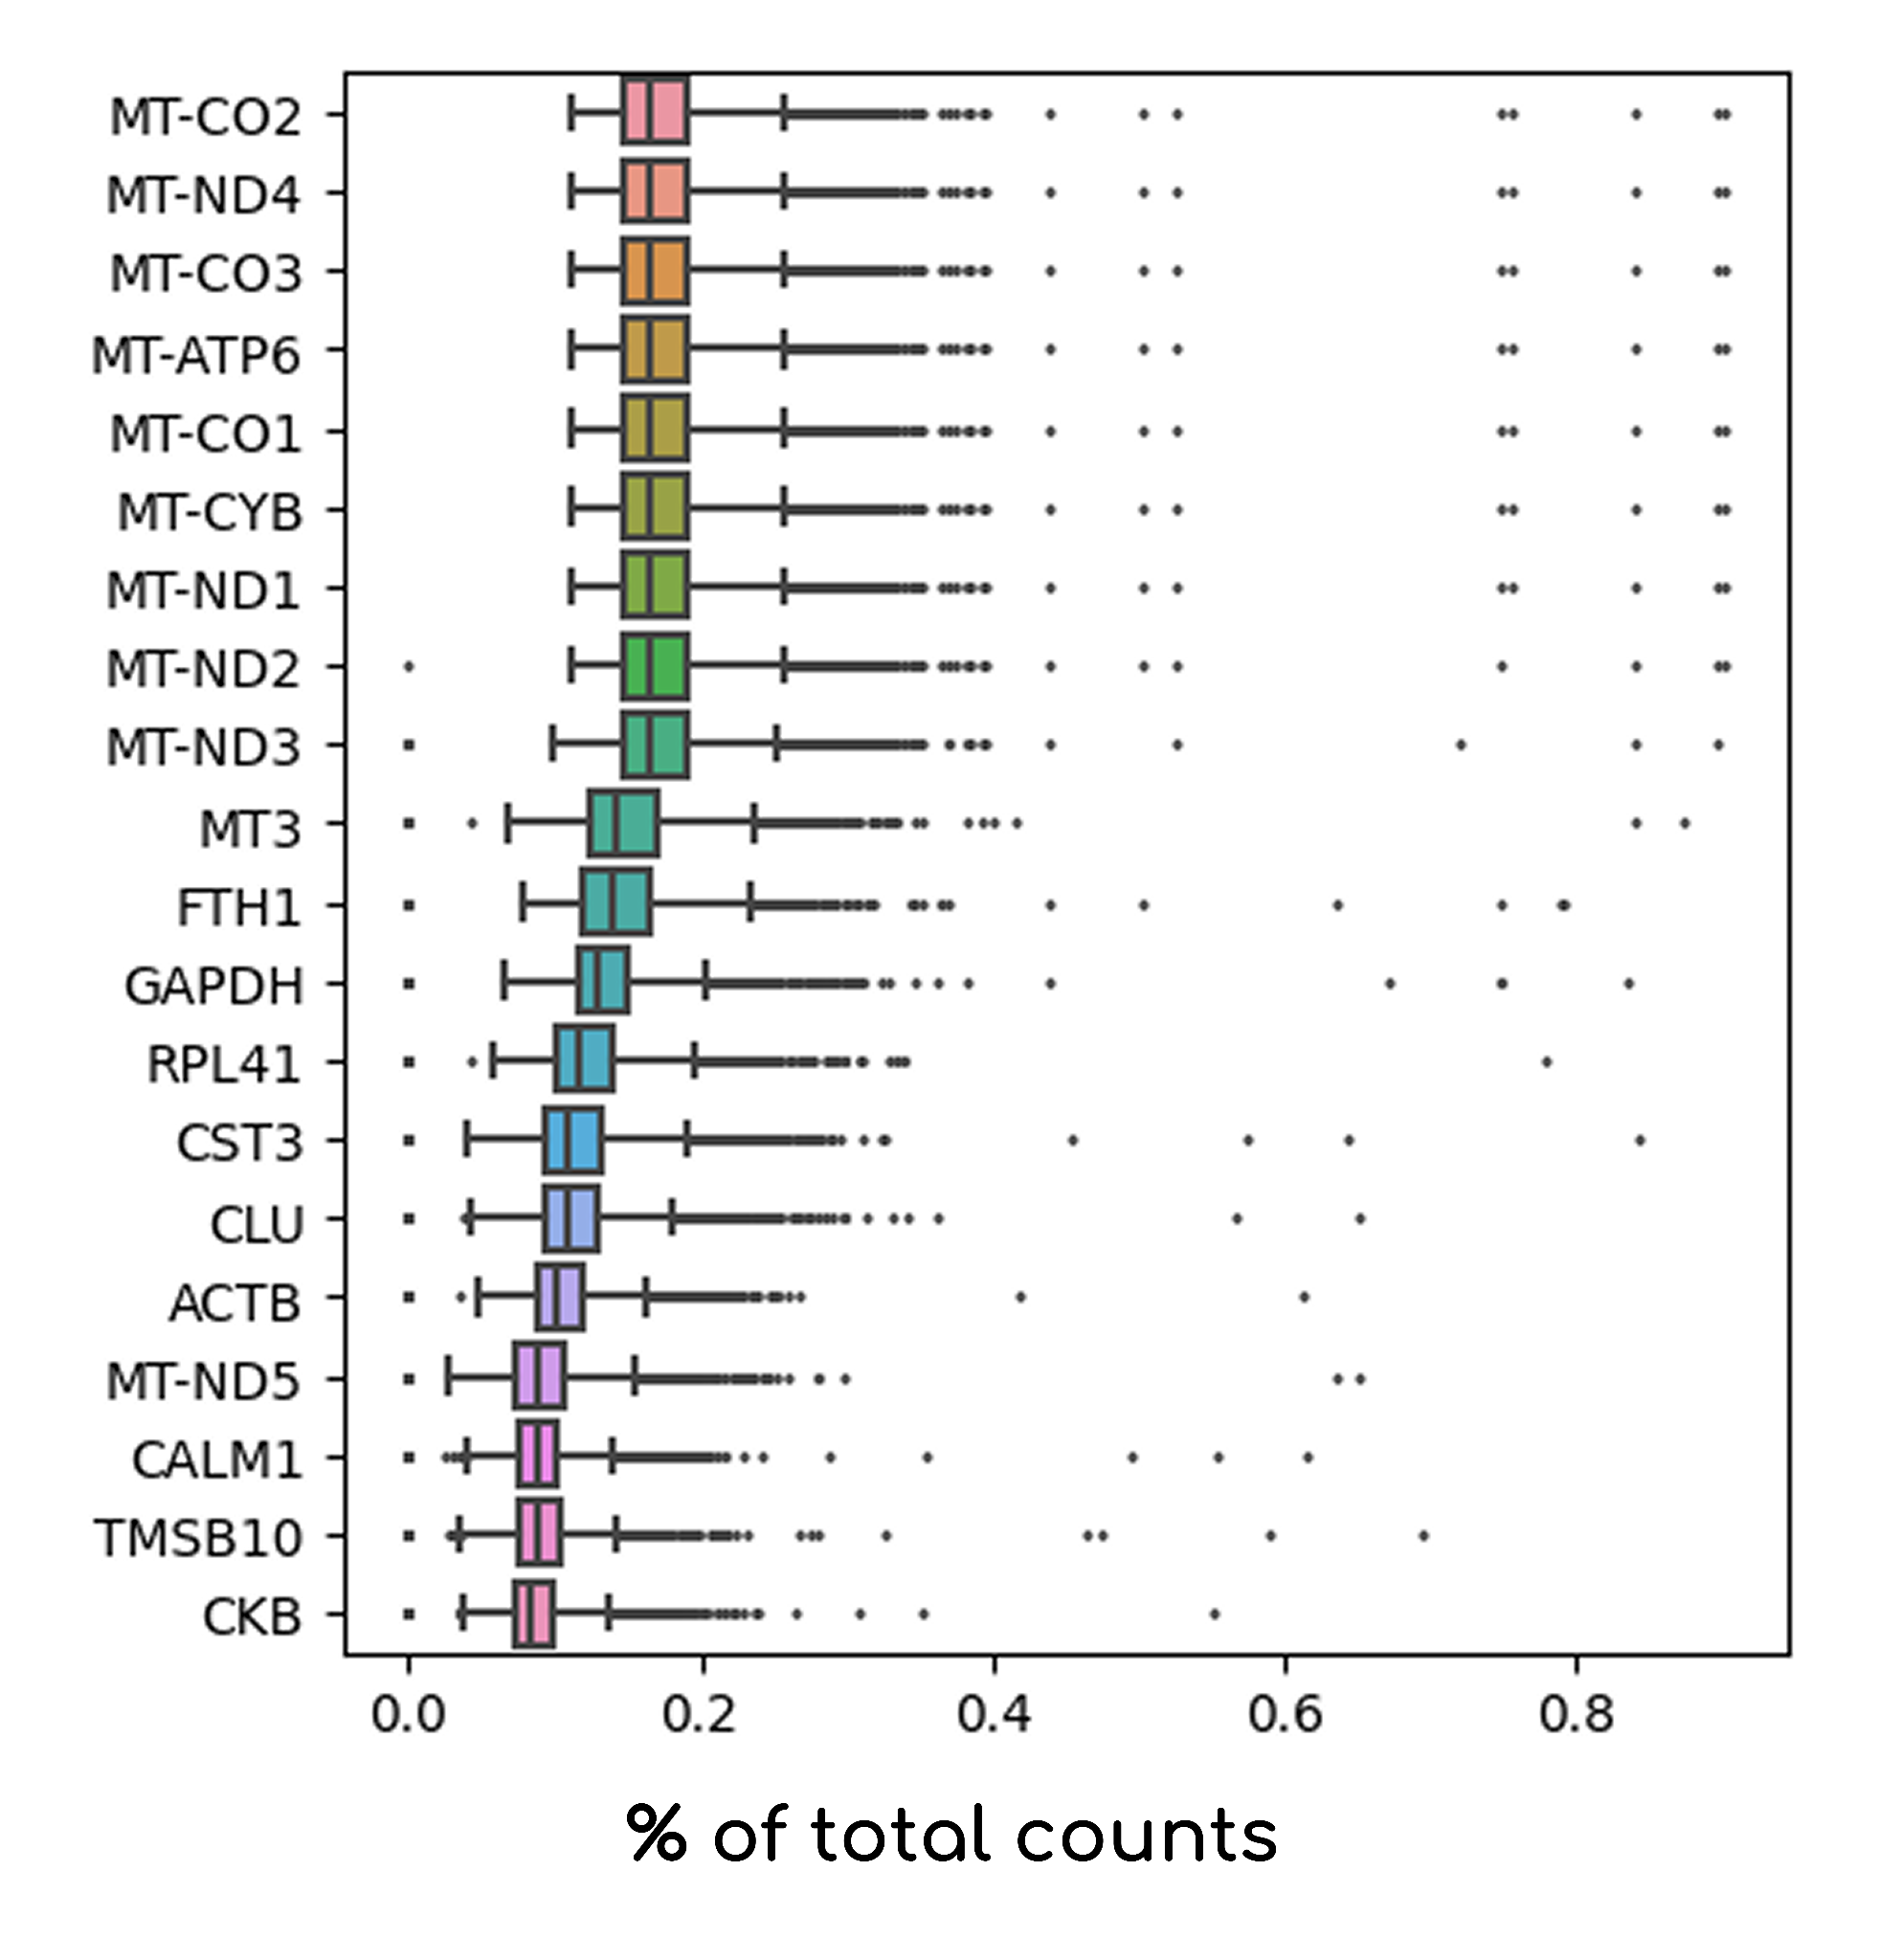


**Figure S3.** SEDIST’s proficiency in identifying the top 20 genes within individual cells is demonstrated.

# References

1. Maynard, K. R. et al. Transcriptome-scale spatial gene expression in the human dorsolateral prefrontal cortex. Nat. Neurosci. 24, 425–436 (2021).

2. 10x Genomics. Human breast cancer block A, section 1-1 (Standard 1.1.0). 10x Genomics. Retrieved December, 2024,from <https://www.10xgenomics.com/datasets/human-breast-cancer-block-a-section-1-1-standard-1-1-0>
